# Supplementary material for: Lung Ultrasound in Predicting Outcomes in Patients with COVID-19 Treated with Extracorporeal Membrane Oxygenation
Source: MDPI journal article supplement (doi:10.3390/v15091796), 2023-08-24
Supplement: s1 [file s1]

| Pathologies                                              | LUS |
|----------------------------------------------------------|-----|
| No pathologies                                           | 0   |
| Multi-focal B-lines (>2 ICS)                             | 1   |
| Focally fixed B-lines (without respiratory echodynamics) | 1   |
| Thickened pleural line                                   | 1   |
| Uneven pleural line (retractions, irregular line)        | 1   |
| Confluent B-lines                                        | 2   |
| Light beam                                               | 2   |
| Interruptions in the pleural line                        | 2   |
| Subpleural lesions (small)                               | 2   |
| Subpleural consolidations (with dynamic airbronchogram)  | 2   |
| Subpleural consolidations (with static airbronchogram)   | 3   |
| Subpleural consolidations (without airbronchogram)       | 3   |
| Subpleural consolidations (with reduced perfusion)       | 3   |

**Table S1: Lung ultrasound scoring**

Lung ultrasound scoring according to Soldati et al. [40], Abbrev.: LUS: lung ultrasound score.

| Parameter                                         | total<br>(n=33)                 | discharge<br>(n=10)             | death<br>(n=23)                 | (Δ) /<br>(OR)            | CI<br>low | CI<br>high | p-<br>value |
|---------------------------------------------------|---------------------------------|---------------------------------|---------------------------------|--------------------------|-----------|------------|-------------|
| <b>Females</b><br><br>[N; %]                      | 17 (53%),<br><br>1 Missing      | 6<br><br>(60%)                  | 11 (50%),<br><br>1 Missing      | OR<br><br>=<br><br>0.68  | 0.11      | 3.82       | 0.71        |
| <b>Days in ICU</b><br><br>[Median; IQR]           | 29<br><br>(20.75 –<br>38.5)     | 22<br><br>(18.5 –<br>33.75)     | 30<br><br>(22,8-35,5)           | Δ<br><br>= 5             | -5.00     | 13.00      | 0.37        |
| <b>Prone/ supine<br/>position</b><br><br>[N; %]   | 19 (66%),<br><br>4 Missings     | 6 (67%),<br><br>1 Missing)      | 13 (65%),<br><br>3 Missings)    | OR<br><br>=<br><br>1.07  | 0.16      | 8.72       | 1           |
| <b>Age (years)</b><br><br>[Median; IQR]           | 56<br><br>(53 – 60.5)           | 55<br><br>(48 60)               | 57<br><br>(54 – 61.5)           | Δ<br><br>=<br><br>5.00   | -3.00     | 12.00      | 0.28        |
| <b>BMI</b><br><br>[Median; IQR]                   | 30.12<br><br>(28.37 –<br>35.92) | 33.01<br><br>(29.57 –<br>36.75) | 29.39<br><br>(27.76 –<br>35.21) | Δ<br><br>= -<br><br>1.88 | -7.38     | 1.52       | 0.15        |
| <b>ECMO duration<br/>(days) [Median;<br/>IQR]</b> | 21<br><br>(16 – 28)             | 18<br><br>(16.25 –<br>24.55)    | 23<br><br>(17 – 28.5)           | Δ<br><br>=<br><br>3.00   | -5.00     | 10.00      | 0.79        |
| <b>Immunomodulatory<br/>therapy</b><br><br>[N; %] | 15 (47%),<br><br>1 Missing      | 5<br><br>(50%)                  | 10 (45%),<br><br>1 Missing      | OR<br><br>=<br><br>0.84  | 0.14      | 4.84       | 1           |

|                                               |                       |                          |                    |                       |       |      |      |
|-----------------------------------------------|-----------------------|--------------------------|--------------------|-----------------------|-------|------|------|
| <b>Total Score</b><br><b>[Median; IQR]</b>    | 13.5<br>(12 – 18)     | 15<br>(13 – 18)          | 13 (12 –<br>18)    | $\Delta$<br>=<br>1.00 | -5.00 | 2.00 | 0.52 |
| <b>Examined areas</b><br><b>[Median; IQR]</b> | 7.5<br>(6 - 8)        | 8<br>(7 – 8)             | 7 (6 – 8)          | $\Delta$<br>=<br>0.00 | -2.00 | 1.00 | 0.59 |
| <b>LUS</b><br><b>[Median; IQR]</b>            | 2<br>(1.63 –<br>2.38) | 1.88<br>(1.62 –<br>2.25) | 2 (1.57 –<br>2.39) | $\Delta$<br>=<br>0.04 | -0.37 | 0.43 | 0.79 |

**Table S2: Patient characteristics and outcome**

Assessed patient characteristics, comparing patients deceased and discharged from intensive care unit. Estimated effect sizes are given as Odds Ratios for categorical variables and as estimated differences for continuous variables together with 95% confidence intervals, Abbrev.: ( $\Delta$ ): Estimated difference, (OR): Odds Ratio.

| <b>Pathologies</b>                                                         | <b>Death<br/>mean</b> | <b>Discharge<br/>mean</b> | <b>p-value</b> |
|----------------------------------------------------------------------------|-----------------------|---------------------------|----------------|
| <b>No pathologie</b>                                                       | 0.022                 | 0.027                     | 0.06           |
| <b>Multi-focal B-lines (&gt;2<br/>ICS)</b>                                 | 0.015                 | 0.016                     | 0.58           |
| <b>Focally fixed B-lines<br/>(without respiratory<br/>echodynamics)</b>    | 0.0003                | 0.000                     | 0.37           |
| <b>Thickened pleural line</b>                                              | 0.10                  | 0.098                     | 0.8            |
| <b>Uneven pleural line<br/>(retractions. irregular<br/>line)</b>           | 0.15                  | 0.19                      | 0.09           |
| <b>Confluent B-lines</b>                                                   | 0.003                 | 0.0008                    | 0.98           |
| <b>Light beam</b>                                                          | 0.0015                | 0.001                     | 0.93           |
| <b>Interruptions in the<br/>pleural line</b>                               | 0.050                 | 0.02                      | 0.15           |
| <b>Subpleural lesions<br/>(small)</b>                                      | 0.196                 | 0.21180                   | 0.4            |
| <b>Subpleural<br/>consolidations (with<br/>dynamic<br/>airbronchogram)</b> | 0.000                 | 0.0006                    | 0.03           |
| <b>Subpleural<br/>consolidations (with</b>                                 | 0.18                  | 0.06                      | 0.001          |

|                                                                       |       |       |      |
|-----------------------------------------------------------------------|-------|-------|------|
| <b>static<br/>airbronchogram)</b>                                     |       |       |      |
| <b>Subpleural<br/>consolidations<br/>(without<br/>airbronchogram)</b> | 0.012 | 0.010 | 0.77 |
| <b>Subpleural<br/>consolidations (with<br/>reduced perfusion)</b>     | 0.000 | 0.002 | 0.93 |

**Table S3: Assesement of detected pathologies**

Occurrence of the detected pathologies in relation to the outcome of the patients.
